# Supplementary material for: Gum arabic-OPO3H2 as a new natural-based green catalyst for the one-pot pseudo-four-component synthesis of naphtho[1,2-e][1,3]oxazines
Source: Royal Society of Chemistry journal article supplement (doi:10.1039/d0ra07199d), 2020-01-01
Supplement: d0ra07199d1.pdf [file d0ra07199d1.pdf]

## Gum Arabic-OPO<sub>3</sub>H<sub>2</sub> as a new natural-based green catalyst for one-pot *pseudo*-four-component synthesis of naphtho[1,2-*e*][1,3]oxazines

Sahar Saadat Hosseinihah,<sup>a</sup> Bi Bi Fatemeh Mirjalili,<sup>\*a</sup> Naeimeh Salehi,<sup>a</sup> Abdolahamid Bamoniri<sup>b</sup>

<sup>a</sup> Department of Chemistry, College of Science, Yazd University, Yazd, P.O.Box 89195-741, Iran. E-mail: fmirjalili@yazd.ac.ir. Tel: +983531232672. Fax: +983538210644.

<sup>b</sup> Department of Organic Chemistry, Faculty of Chemistry, University of Kashan, Kashan, I.R.IRAN

### 2-Phenyl-2,3-dihydro-1*H*-naphtho[1,2-*e*][1,3]oxazine (4a) (Table 2, entry 1):

White solid, m.p. 45-47 °C; FT-IR (ATR)  $\bar{\nu}$  (cm<sup>-1</sup>): 3060, 1600, 1496, 1231, 1057; <sup>1</sup>H NMR (Acetone-d<sub>6</sub>, 400 MHz)  $\delta$  ppm: 7.89 (d, 1H, <sup>3</sup>J= 8.4 Hz, Ar-H), 7.85 (d, 1H, <sup>3</sup>J= 8 Hz, Ar-H), 7.73 (d, 1H, <sup>3</sup>J= 9.2 Hz, Ar-H), 7.53-7.57 (m, 1H, Ar-H), 7.38-7.42 (m, 1H, Ar-H), 7.23-7.28 (m, 4H, Ar-H), 7.04 (d, 1H, <sup>3</sup>J= 8.8 Hz, Ar-H), 6.87-6.91 (m, 1H, Ar-H), 5.54 (s, 2H, O-CH<sub>2</sub>-N), 5.06 (s, 2H, -Ar-CH<sub>2</sub>-N).

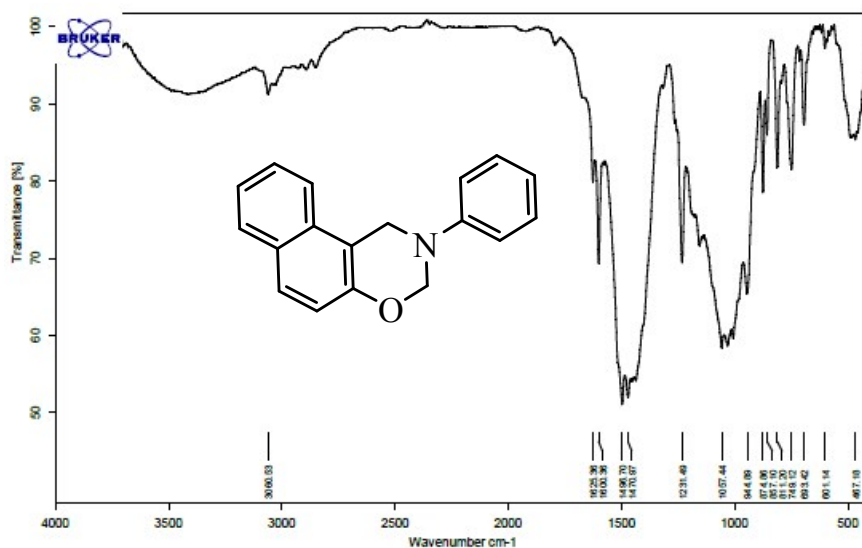

The FT-IR spectrum of product (4a)

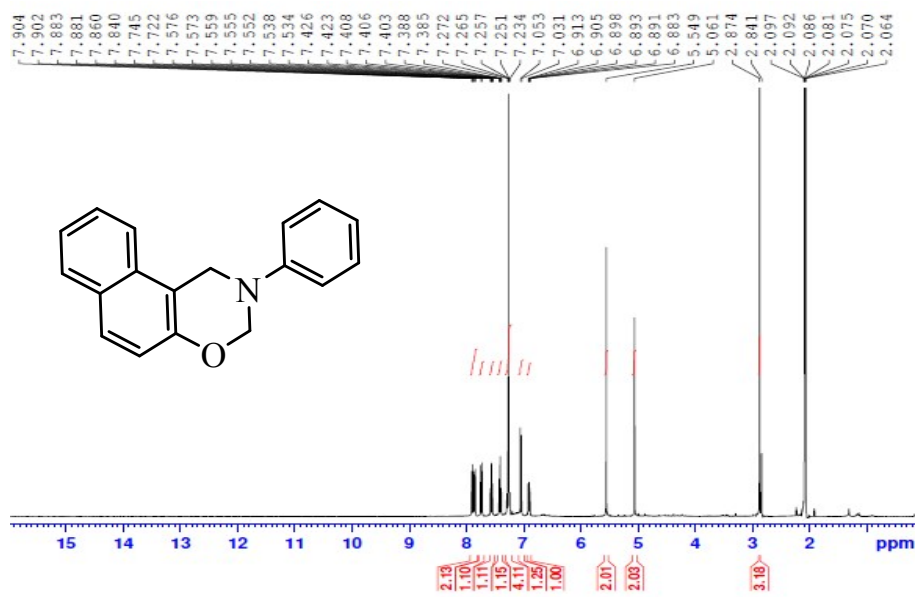

The <sup>1</sup>H NMR (400 MHz) spectrum of product (4a)

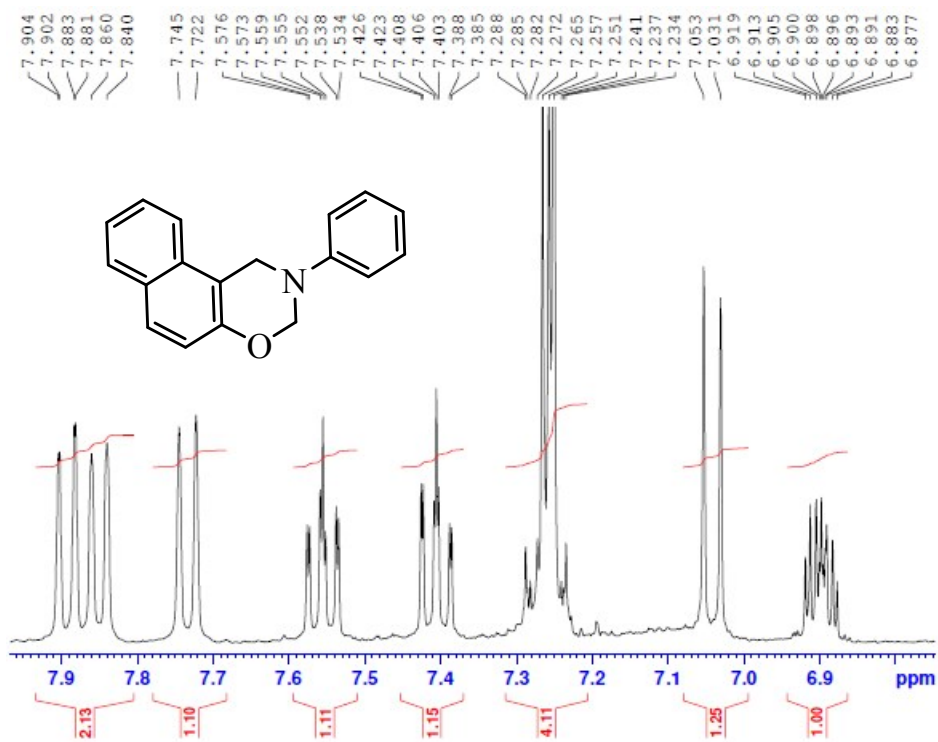

The <sup>1</sup>H NMR (400 MHz) spectrum of product (4a)

**2,3-Dihydro-1*H*-naphtho[1,2-*e*][1,3]oxazine(4b) (Table 2, entry 2):**

Yellow solid, m.p. 87-89 °C; FT-IR (ATR)  $\bar{\nu}$  (cm<sup>-1</sup>): 1597, 1470, 1226, 1096; <sup>1</sup>H NMR (Acetone-*d*<sub>6</sub>, 400 MHz) / $\delta$  ppm: 7.82 (t, 2H, <sup>3</sup>*J*= 8.8 Hz, Ar-H), 7.69 (d, 1H, <sup>3</sup>*J*= 9.2 Hz, Ar-H), 7.51 (t, 1H, <sup>3</sup>*J*= 8 Hz, Ar-H), 7.36 (t, 1H, <sup>3</sup>*J*= 8 Hz, Ar-H), 6.99-7.04 (m, 3H, Ar-H), 7.09-7.11 (m, 2H, Ar-H), 5.52 (s, 2H, O-CH<sub>2</sub>-N), 5.02 (s, 2H, -Ar-CH<sub>2</sub>-N), 2.24 (s, 3H, CH<sub>3</sub>-Ar).

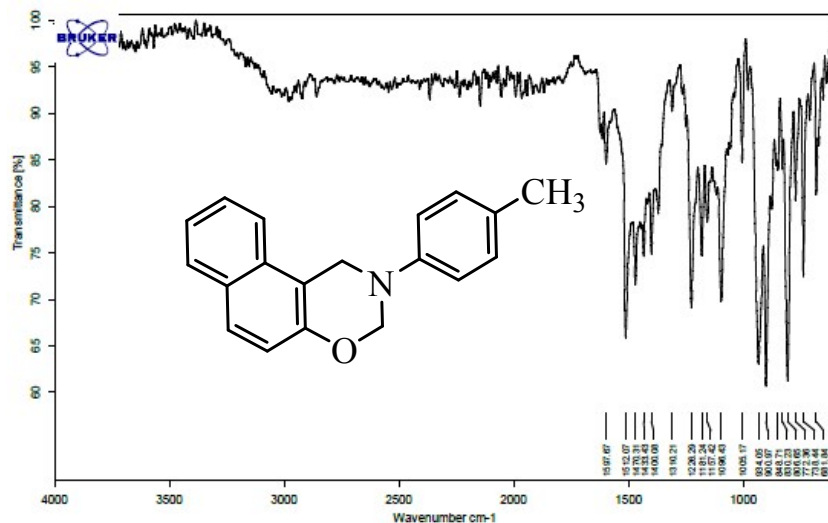

The FT-IR spectrum of product (4b)

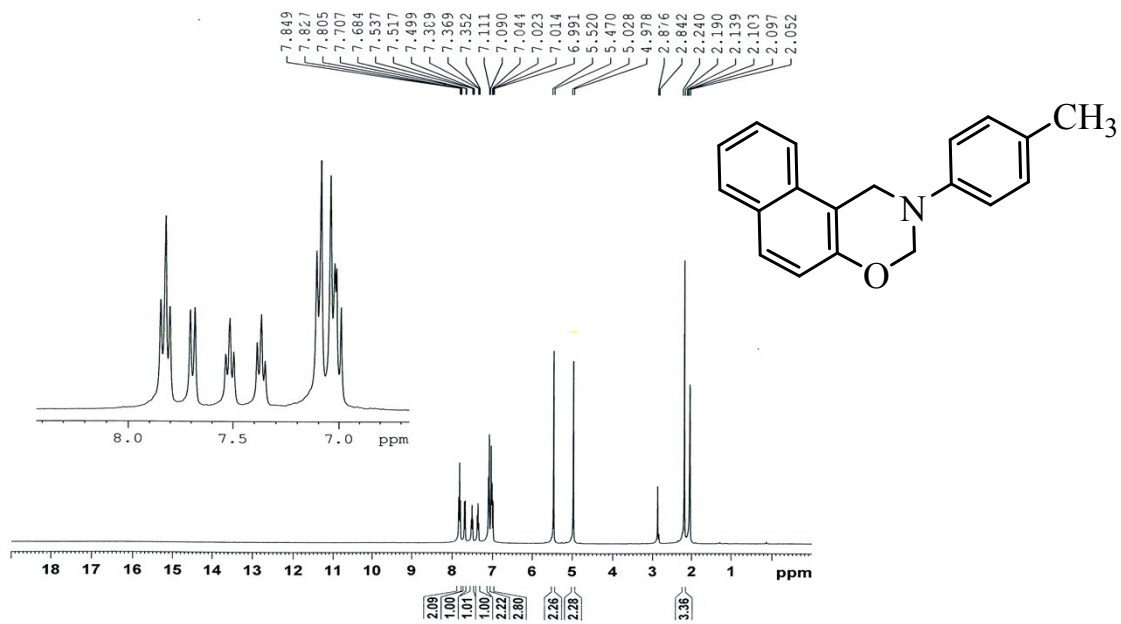

The <sup>1</sup>H NMR (400 MHz) spectrum of product (4b)

**2-(4-Ethylphenyl)-2,3-dihydro-1H-naphtho[1,2-e][1,3]oxazine (4c) (Table 2, entry 3):**

Off-white solid, m.p. 44-46 °C; FT-IR (ATR)  $\bar{\nu}$  (cm<sup>-1</sup>): 1597, 1467, 1226, 1056; <sup>1</sup>H NMR (Acetone-d<sub>6</sub>, 400 MHz) / $\delta$  ppm: 7.80-7.85 (m, 2H, Ar-H), 7.69-7.71 (m, 1H, Ar-H), 7.50-7.55 (m, 1H, Ar-H), 7.35-7.40 (m, 1H, Ar-H), 6.99-7.14 (m, 5H, Ar-H), 5.49 (s, 2H, O-CH<sub>2</sub>-N), 5.00 (s, 2H, -Ar-CH<sub>2</sub>-N), 2.49-2.54 (m, 2H, -CH<sub>2</sub>-CH<sub>3</sub>), 1.15 (t, 3H, <sup>3</sup>J= 7 Hz, -CH<sub>2</sub>-CH<sub>3</sub>).

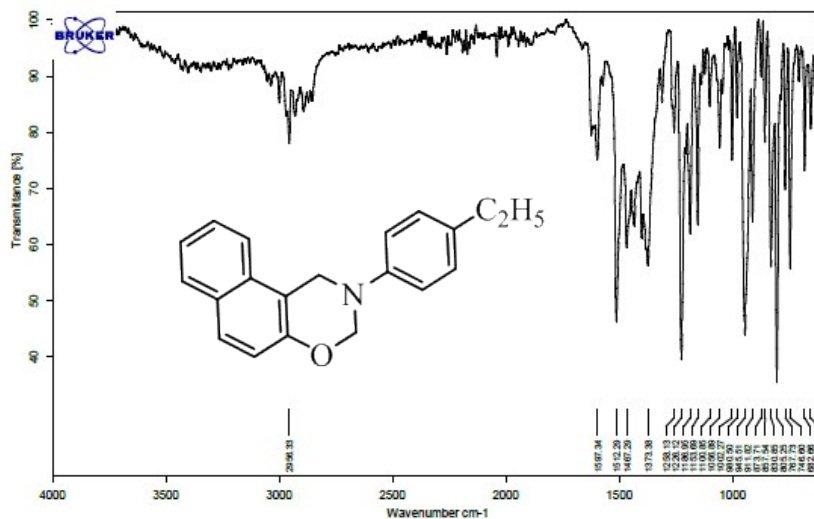

The FT-IR spectrum of product (4c)

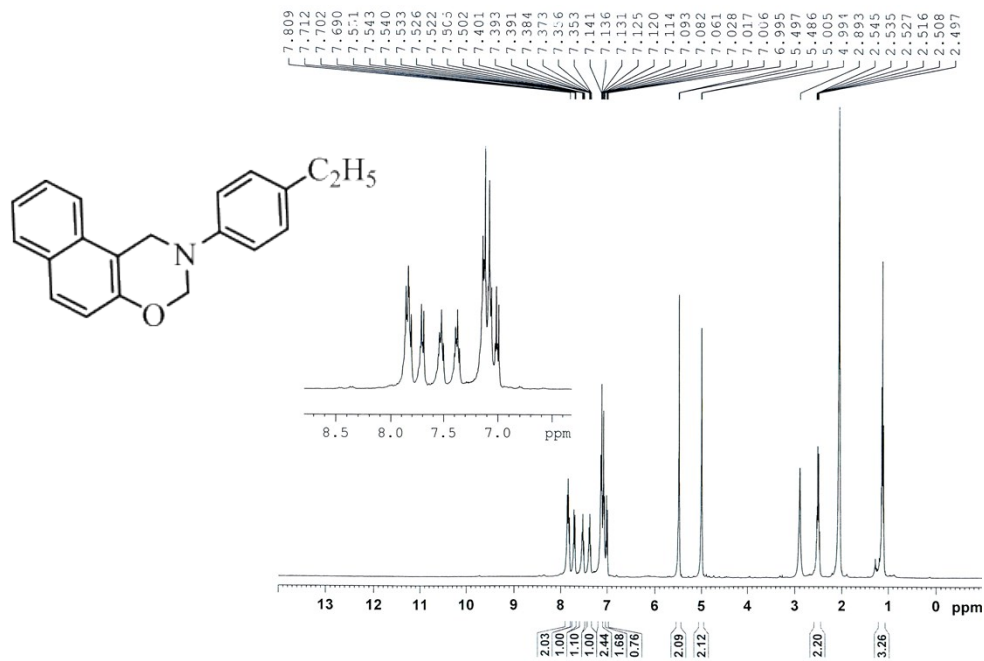

The <sup>1</sup>H NMR (400 MHz) spectrum of product (4c)

**2-(4-Bromophenyl)-2,3-dihydro-1H-naphtho[1,2-e][1,3]oxazine(4d)** (Table 2, entry 4):

White solid, m.p. 116-119 °C; FT-IR (ATR)  $\bar{\nu}$  (cm<sup>-1</sup>): 1588, 1489, 1223, 1092; <sup>1</sup>H NMR (Acetone-d<sub>6</sub>, 400 MHz) / $\delta$  ppm: 7.84 (t, 2H, <sup>3</sup>J= 9.2 Hz, Ar-H), 7.71 (d, 1H, <sup>3</sup>J= 9.2 Hz, Ar-H), 7.52 (t, 1H, <sup>3</sup>J= 8.4 Hz, Ar-H), 7.37-7.40 (m, 3H, Ar-H), 7.20 (d, 2H, <sup>3</sup>J= 9.2 Hz, Ar-H), 7.01 (d, 1H, <sup>3</sup>J= 9.2 Hz, Ar-H), 5.51 (s, 2H, O-CH<sub>2</sub>-N), 5.03(s, 2H, -Ar-CH<sub>2</sub>-N).

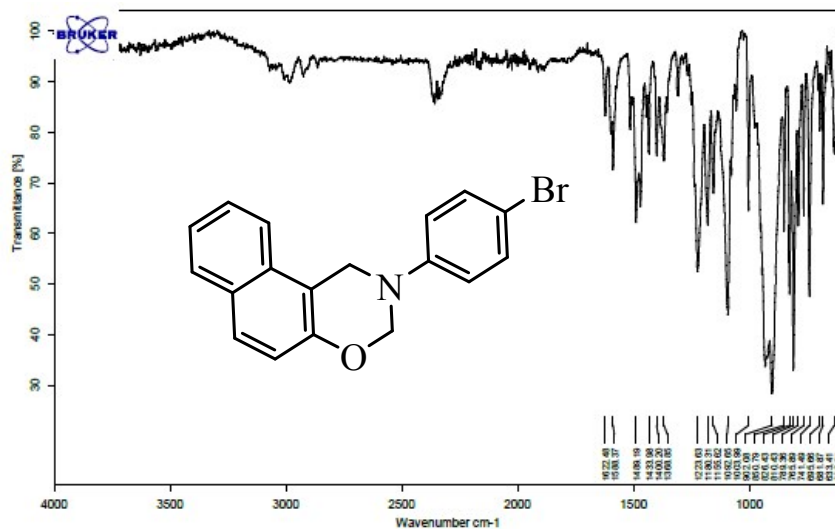

The FT-IR spectrum of product (4d)

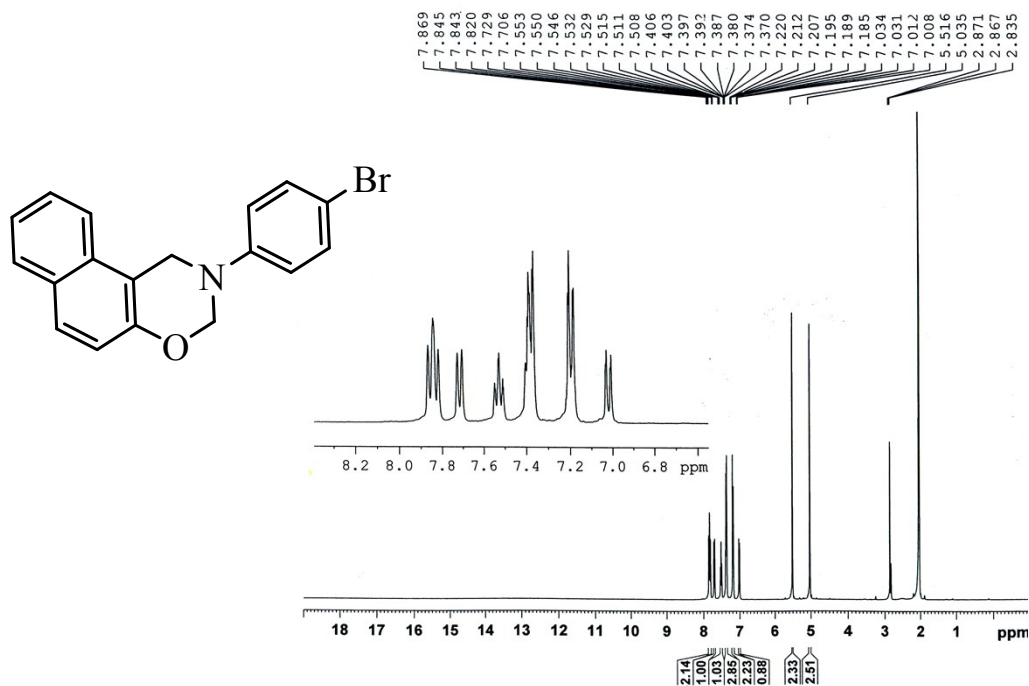

The <sup>1</sup>H NMR (400 MHz) spectrum of product (4d)

**2-(4-Chlorophenyl)-2,3-dihydro-1H-naphtho[1,2-e][1,3]oxazine(4e) (Table 2, entry 5):**

White solid, m.p. 100-103 °C; FT-IR (ATR)  $\bar{\nu}$  (cm<sup>-1</sup>): 1593, 1492, 1225, 1092; <sup>1</sup>H NMR (Acetone-d<sub>6</sub>, 400 MHz)  $\delta$  ppm: 7.84 (t, 2H, <sup>3</sup>J= 9.2 Hz, Ar-H), 7.71 (d, 1H, <sup>3</sup>J= 8.8 Hz, Ar-H), 7.53 (t, 1H, <sup>3</sup>J= 7.2 Hz, Ar-H), 7.38 (t, 1H, <sup>3</sup>J= 7.6 Hz, Ar-H), 7.24-7.29 (m, 4H, Ar-H), 7.02 (d, 1H, <sup>3</sup>J= 8.8 Hz, Ar-H), 5.51 (s, 2H, O-CH<sub>2</sub>-N), 5.03 (s, 2H, -Ar-CH<sub>2</sub>-N).

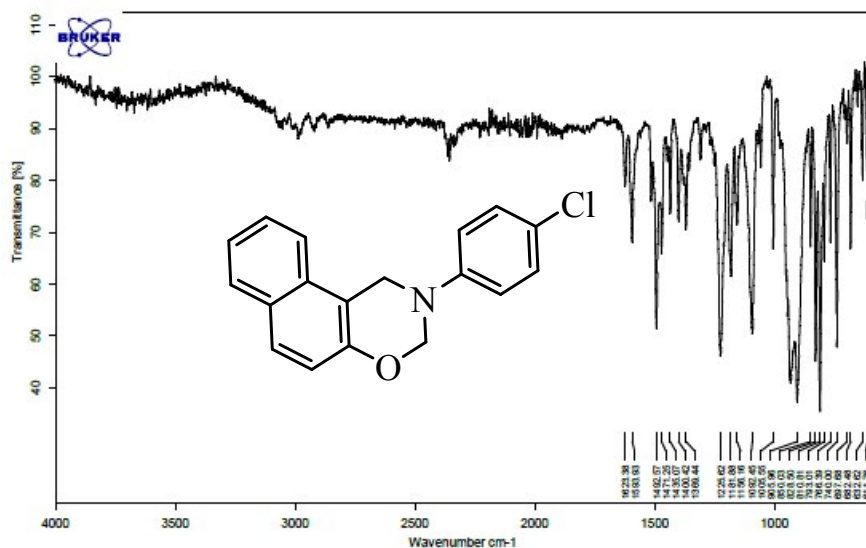

The FT-IR spectrum of product (4e)

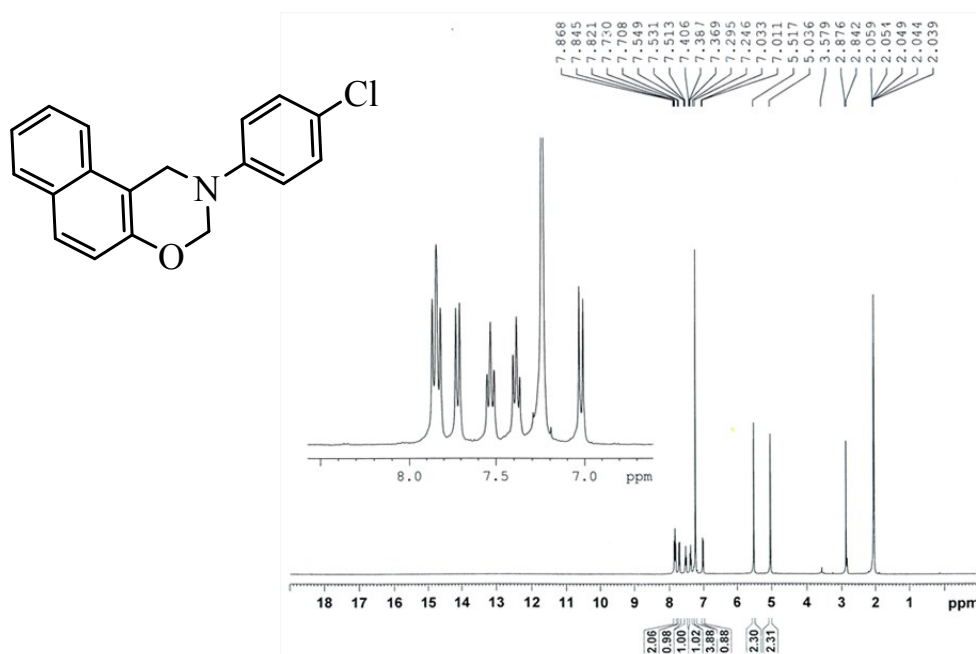

The <sup>1</sup>H NMR (400 MHz) spectrum of product (4e)

**2-(4-Methoxyphenyl)-2,3-dihydro-1H-naphtho[1,2-e][1,3]oxazine(4f) (Table 2, entry 6):**

Off-white solid, m.p. 75-77 °C; FT-IR (ATR)  $\bar{\nu}$  (cm<sup>-1</sup>): 1596, 1467, 1246, 1230, 1031; <sup>1</sup>H NMR (Acetone-d<sub>6</sub>, 400 MHz)  $\delta$  ppm: 7.80-7.82 (m, 2H, Ar-H), 7.70 (d, 1H, <sup>3</sup>J= 8.8 Hz, Ar-H), 7.51 (m, 1H, Ar-H), 7.36 (m, 1H, Ar-H), 7.13 (d, 2H, <sup>3</sup>J= 7.2 Hz, Ar-H), 7.00 (d, 1H, <sup>3</sup>J= 8.8 Hz, Ar-H), 6.80 (d, 2H, <sup>3</sup>J= 7.2 Hz, Ar-H), 5.42 (s, 2H, O-CH<sub>2</sub>-N), 4.93(s, 2H, -Ar-CH<sub>2</sub>-N), 3.68 (s, 3H, O-CH<sub>3</sub>).

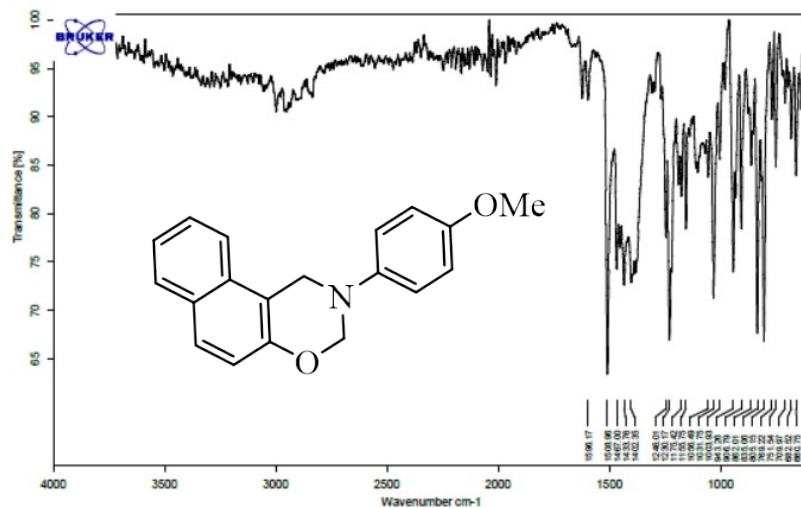

The FT-IR spectrum of product (4f)

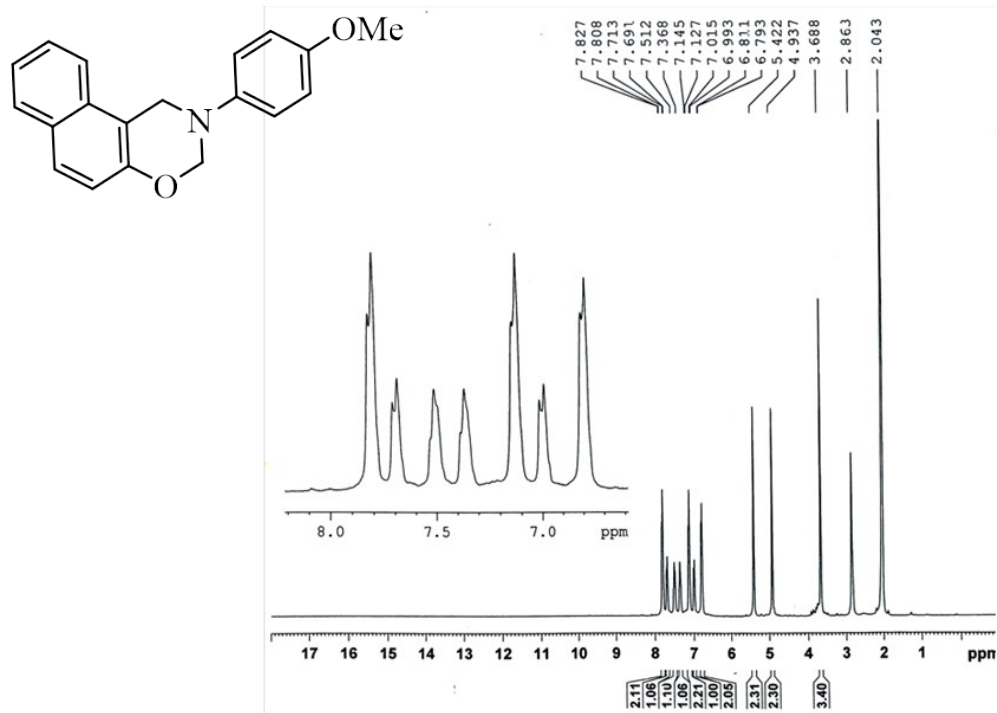

The <sup>1</sup>H NMR (400 MHz) spectrum of product (4f)

**2-Benzyl-2,3-dihydro-1H-naphtho[1,2-e][1,3]oxazine(4g) (Table 2, entry 7):**

Off-white, m.p. 123-125 °C; FT-IR (ATR)  $\bar{\nu}$  (cm<sup>-1</sup>): 1623, 1597, 1461, 1223, 1058, 738.

<sup>1</sup>H NMR (DMSO-d<sub>6</sub>, 500 MHz) / $\delta$  ppm: 7.05-7.71 (m, 11H, Ar-H), 4.89 (s, 2H, O-CH<sub>2</sub>-N), 4.22 (s, 2H, -Ar-CH<sub>2</sub>-N), 3.89 (s, 2H, -Ar-CH<sub>2</sub>-N); <sup>13</sup>C NMR (DMSO-d<sub>6</sub>, 100 MHz) / $\delta$  ppm: 46.55, 55.17, 81.55, 111.67, 118.32, 121.15, 123.37, 126.57, 127.19, 127.76, 128.34, 128.39, 128.49, 128.59, 131.53, 138.33, 151.41.

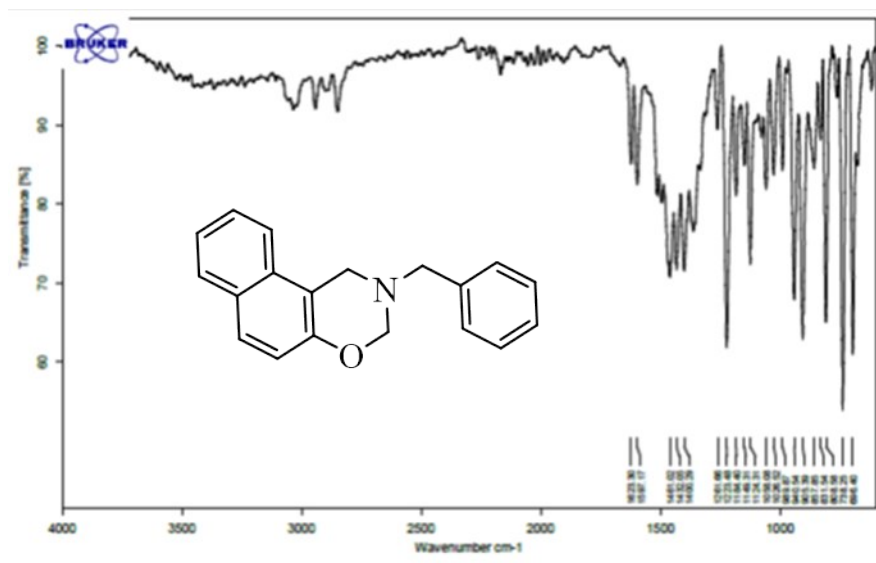

The FT-IR spectrum of product (4g)

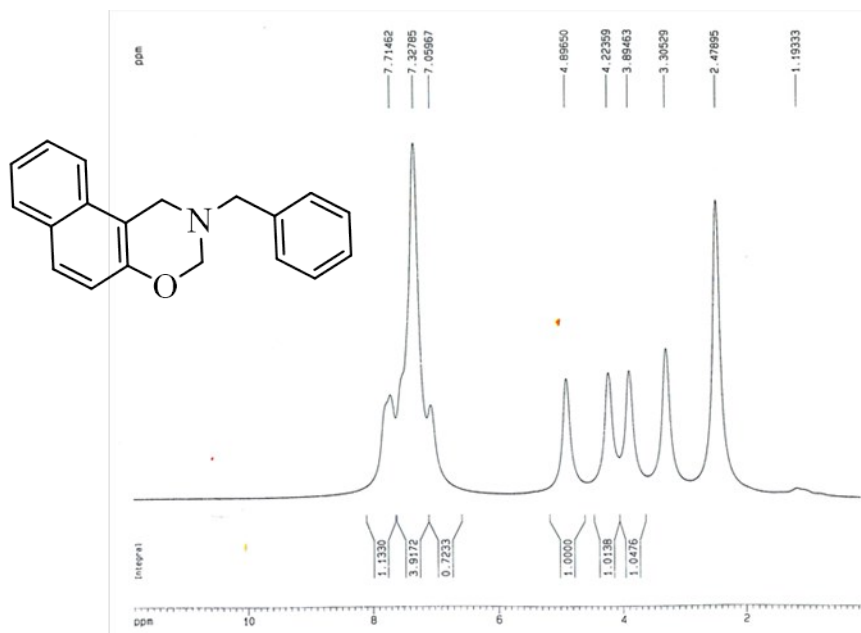

The <sup>1</sup>H NMR (500 MHz) spectrum of product (4g)



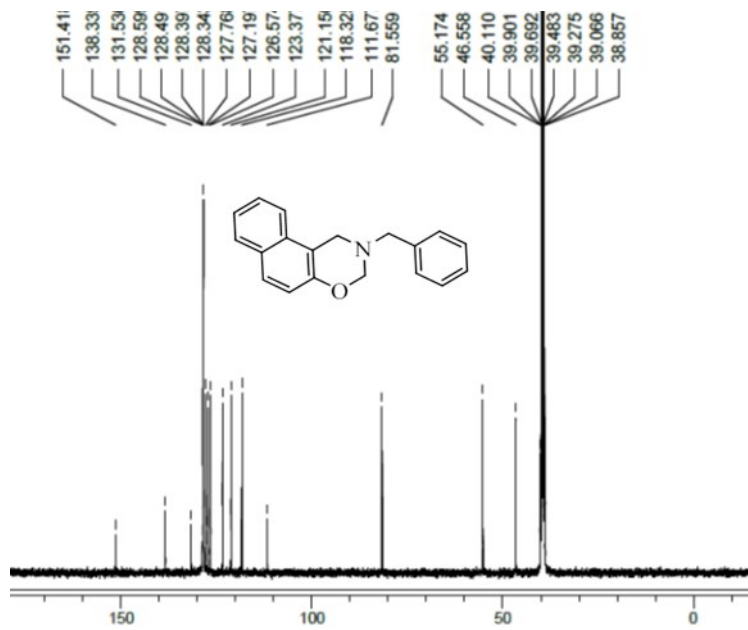

The  $^{13}\text{C}$ -NMR (100 MHz) spectrum of product (4g)

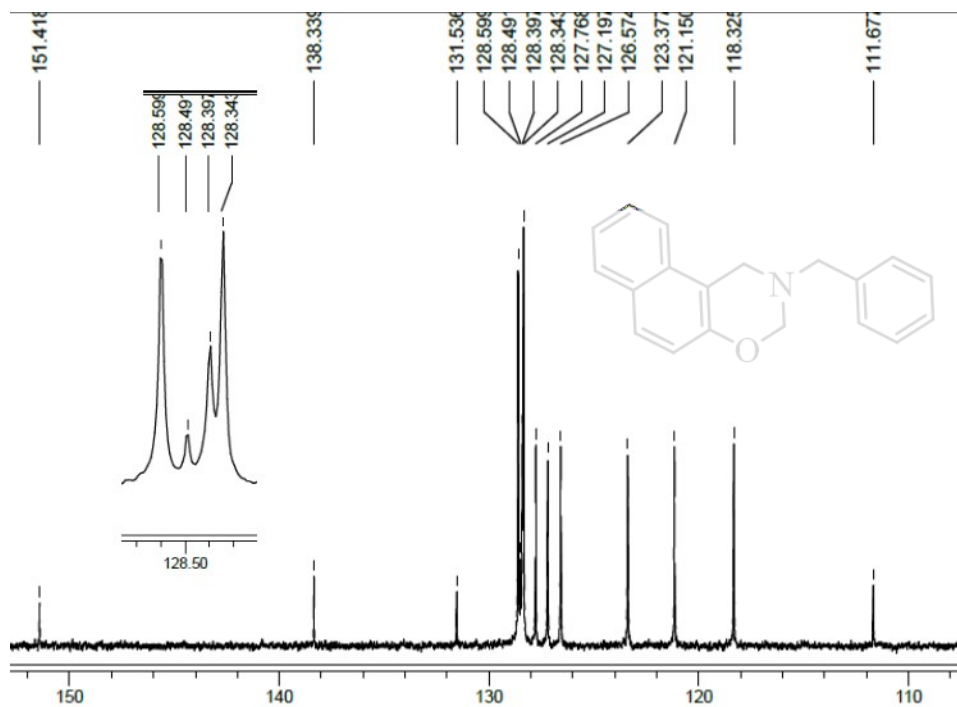

The  $^{13}\text{C}$ -NMR (100 MHz) spectrum of product (4g)

**2-(2-Chlorobenzyl)-2,3-dihydro-1H-naphtho[1,2-e][1,3]oxazine (4h) (Table 2, entry 8):**

Yellow solid, m.p. 70-73 °C; FT-IR (ATR)  $\bar{\nu}$  (cm<sup>-1</sup>): 1594, 1468, 1226, 1057; <sup>1</sup>H NMR (DMSO-d<sub>6</sub>, 500 MHz) / $\delta$  ppm: 7.07-7.82 (m, 10H, Ar-H), 4.95 (s, 2H, O-CH<sub>2</sub>-N), 4.27 (s, 2H, -Ar-CH<sub>2</sub>-N), 4.00 (s, 2H, -Ar-CH<sub>2</sub>-N); <sup>13</sup>C NMR (DMSO-d<sub>6</sub>, 100 MHz) / $\delta$  ppm: 46.82, 52.56, 81.94, 111.73, 118.33, 121.26, 123.42, 126.46, 127.23, 127.85, 128.39, 128.50, 128.90, 129.35, 130.61, 131.54, 133.23, 135.81, 151.41.

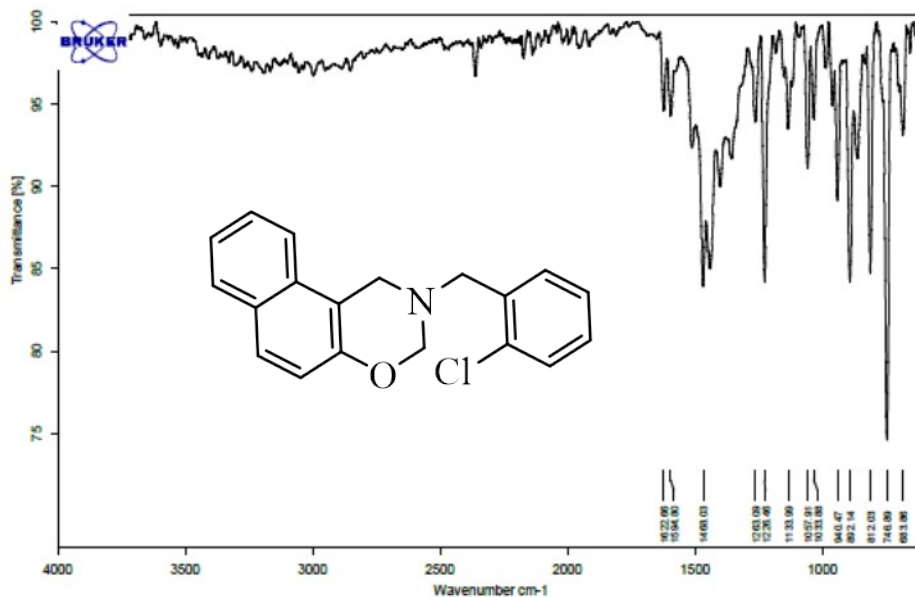

The FT-IR spectrum of product (4h)

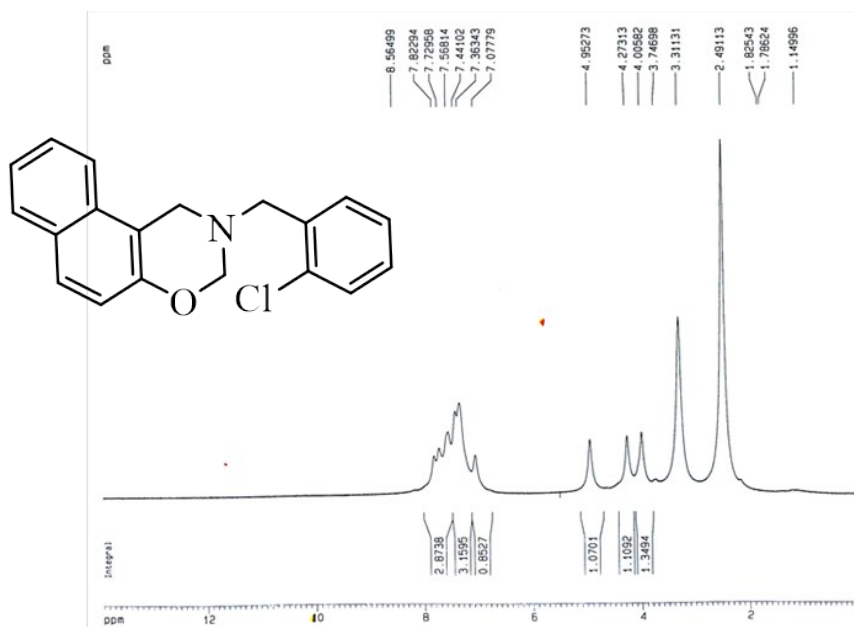

The <sup>1</sup>H NMR (500 MHz) spectrum of product (4h)

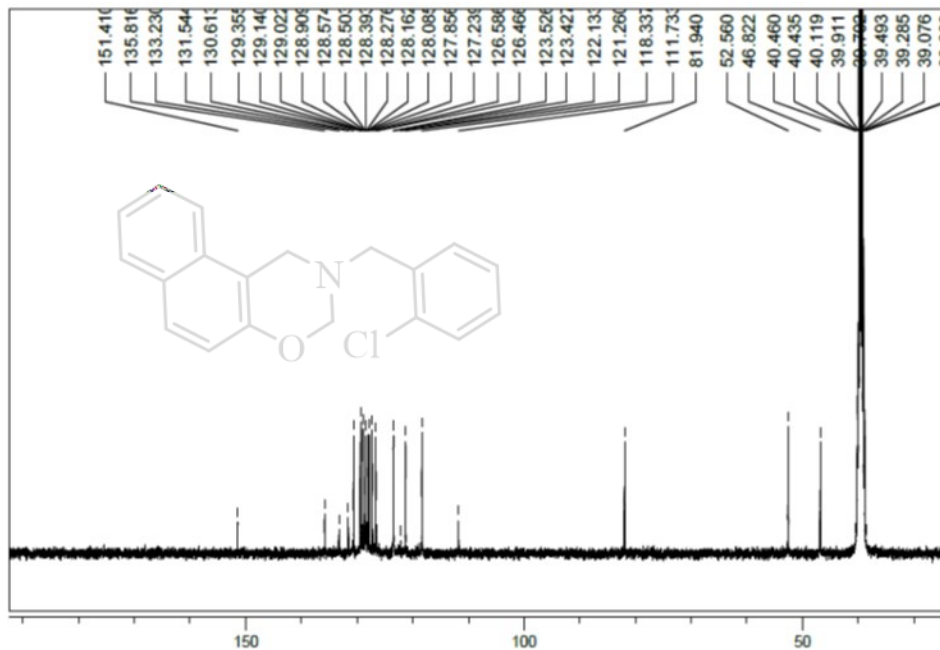

The <sup>13</sup>C-NMR (100 MHz) spectrum of product (4h)

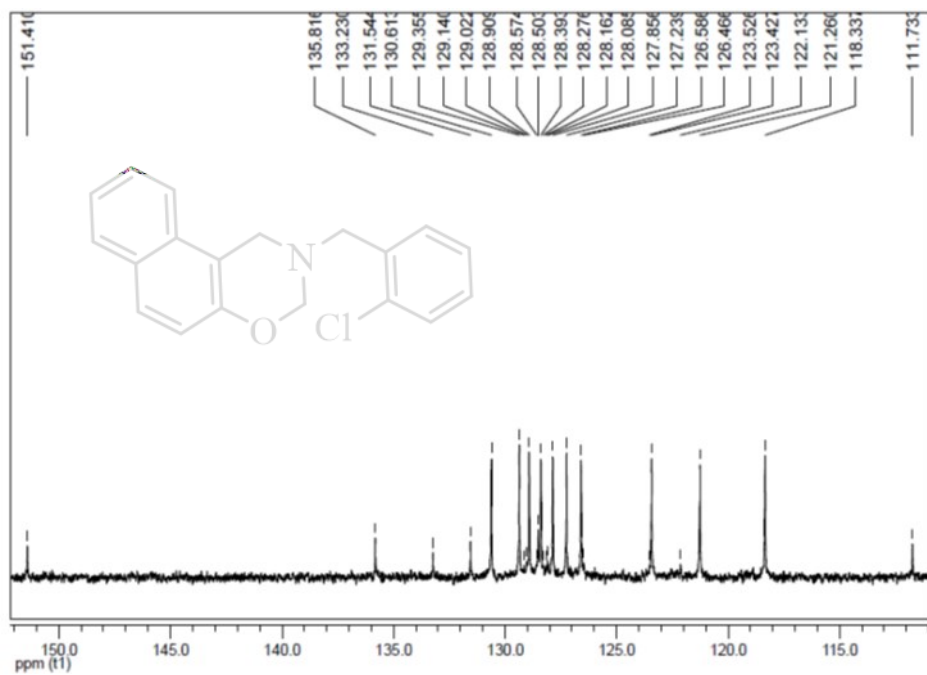

The <sup>13</sup>C-NMR (100 MHz) spectrum of product (4h)

**2-Phenethyl-2,3-dihydro-1H-naphtho[1,2-e][1,3]oxazine(4i) (Table 2, entry 9):**

White solid, m.p. 232 °C (d); FT-IR (ATR)  $\bar{\nu}$  (cm<sup>-1</sup>): 1597, 1469, 1225, 1060; <sup>1</sup>H NMR (DMSO-d<sub>6</sub>, 500 MHz)  $\delta$  ppm: 7.81 (m, 1H, Ar-H), 7.69 (m, 2H, Ar-H), 7.49 (m, 1H, Ar-H), 7.35 (m, 1H, Ar-H), 7.24 (m, 5H, Ar-H), 7.02 (m, 1H, Ar-H), 4.92 (s, 2H, O-CH<sub>2</sub>-N), 4.32 (s, 2H, -Ar-CH<sub>2</sub>-N), 2.96 (m, 2H, Ar-CH<sub>2</sub>-CH<sub>2</sub>-N), 2.88 (m, 2H, Ar-CH<sub>2</sub>-CH<sub>2</sub>-N); <sup>13</sup>C NMR (DMSO-d<sub>6</sub>, 125 MHz)  $\delta$  ppm: 34.86, 47.95, 53.92, 82.69, 113.08, 119.18, 122.26, 124.19, 126.74, 127.33, 128.51, 129.05, 129.22, 129.31, 129.54, 132.43, 140.88, 152.43.

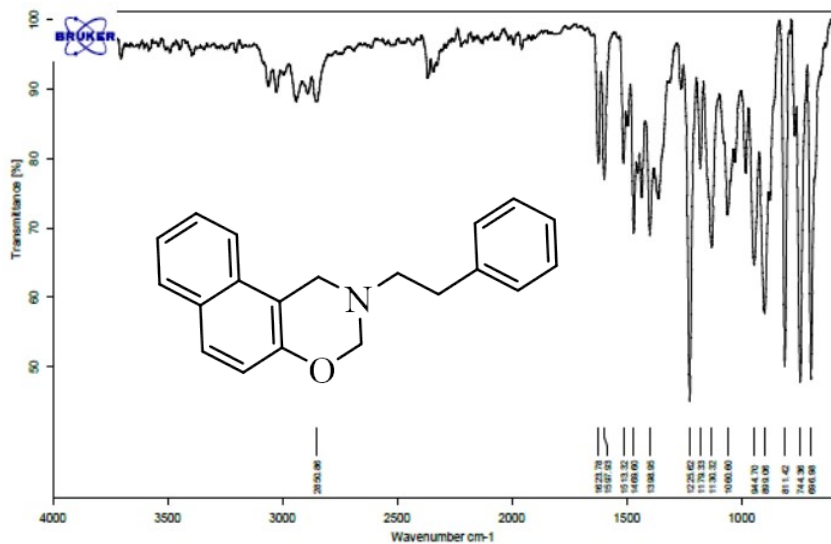

The FT-IR spectrum of product (4i)

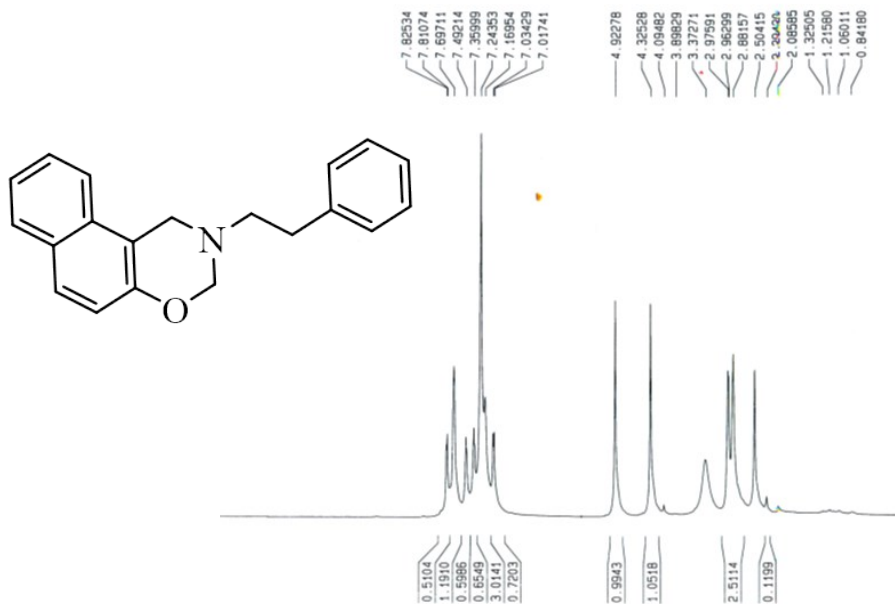

The <sup>1</sup>H NMR (500 MHz) spectrum of product (4i)

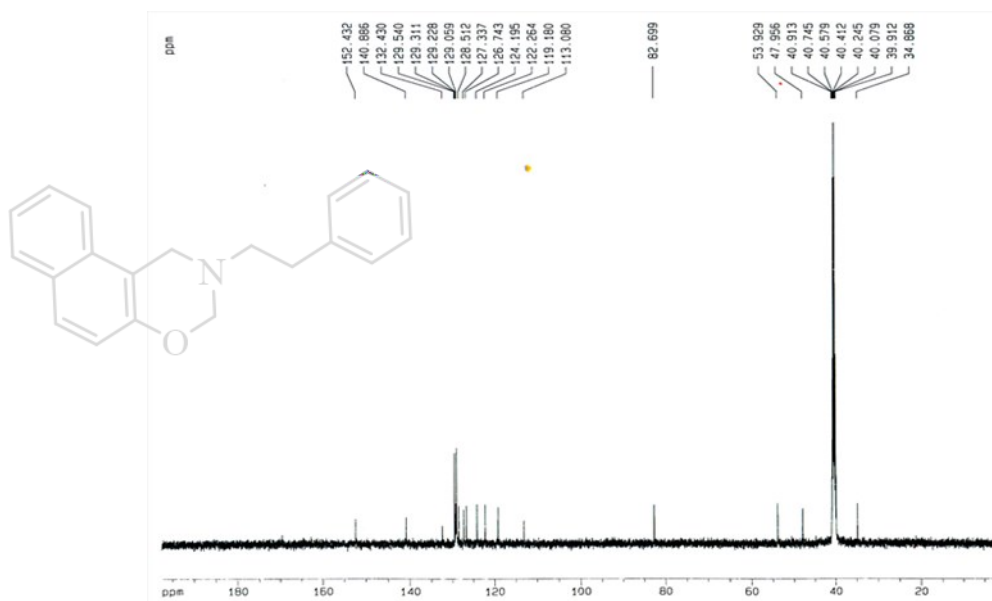

The <sup>13</sup>C-NMR (100 MHz) spectrum of product (4i)

**2-(Furan-2-ylmethyl)-2,3-dihydro-1H-naphtho[1,2-e][1,3]oxazine(4j) (Table 2, entry 10):**

Pale-pink, m.p. 98-100 °C; FT-IR (ATR)  $\bar{\nu}$  (cm<sup>-1</sup>): 1597, 1467, 1226, 1060; <sup>1</sup>H NMR (DMSO-d<sub>6</sub>, 500 MHz) / $\delta$  ppm: 7.71-8.02 (m, 4H, Ar-H), 7.36-7.61 (m, 2H, Ar-H), 7.04 (s, 1H, Ar-H), 6.32-6.52 (m, 2H, Ar-H), 4.89 (s, 2H, O-CH<sub>2</sub>-N), 4.26 (s, 2H, -Ar-CH<sub>2</sub>-N), 3.90 (s, 2H, furan-CH<sub>2</sub>-N); <sup>13</sup>C NMR (DMSO-d<sub>6</sub>, 125 MHz) / $\delta$  ppm: 46.37, 47.86, 81.22, 108.76, 110.42, 111.52, 118.27, 121.19, 123.43, 126.60, 127.80, 128.39, 128.50, 131.48, 142.70, 151.29, 151.79.

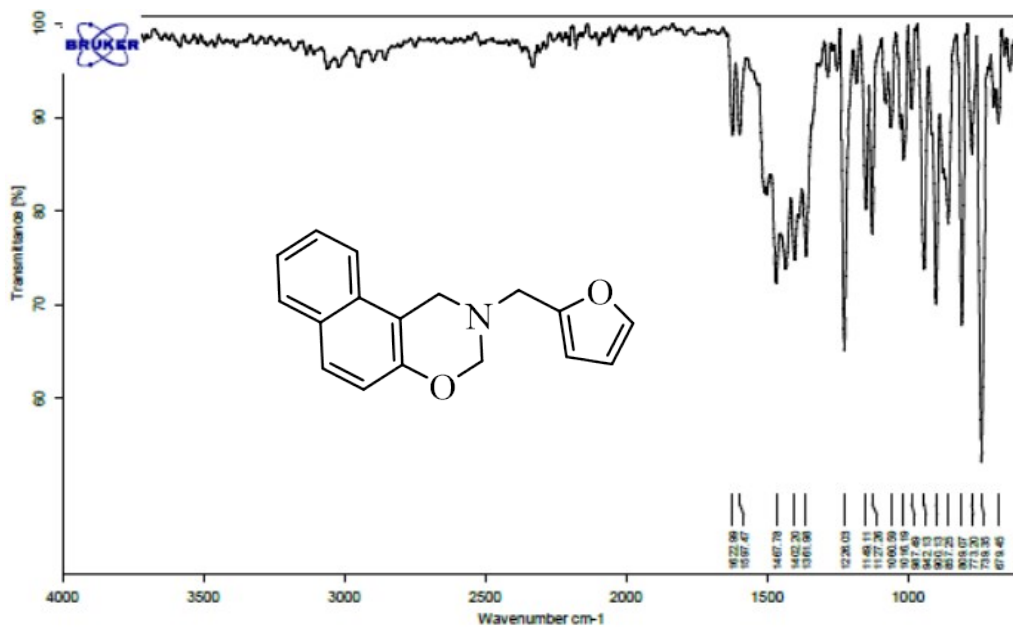

The FT-IR spectrum of product (4j)

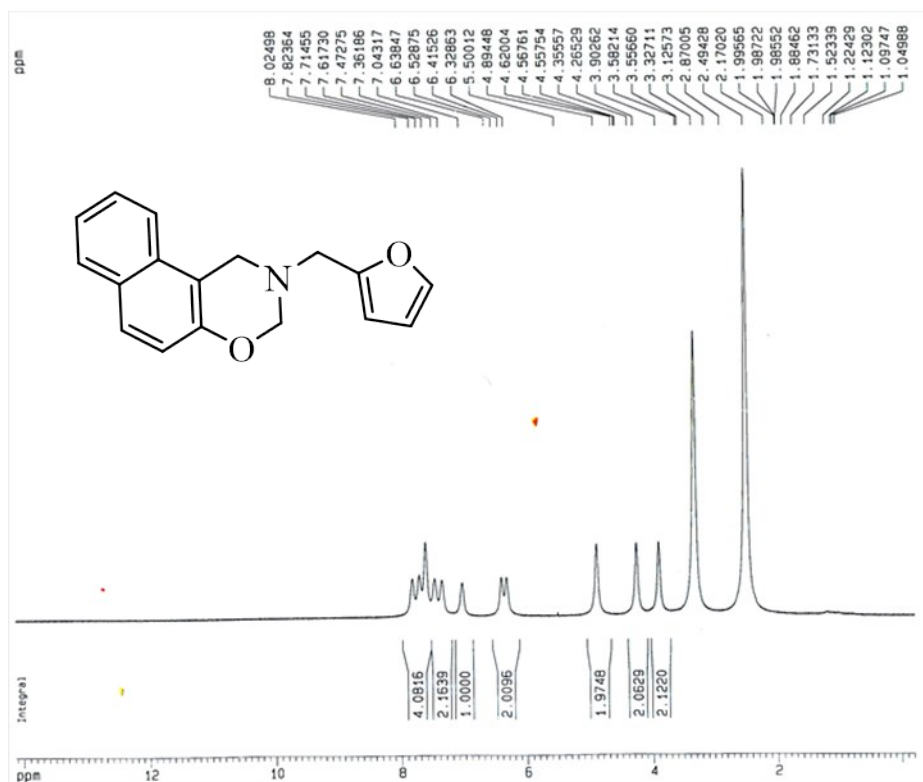

The <sup>1</sup>H NMR (500 MHz) spectrum of product (4j)

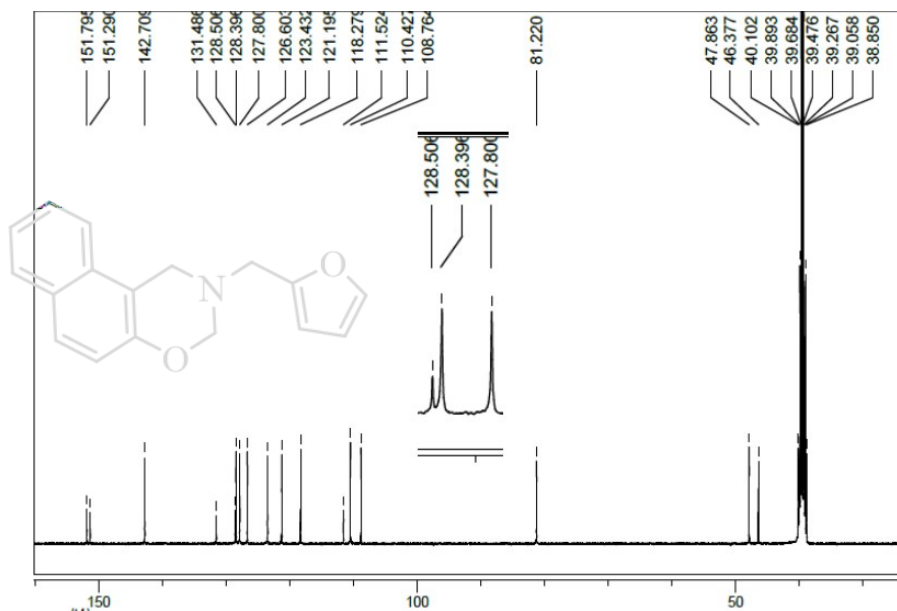

The  $^{13}\text{C}$ -NMR (100 MHz) spectrum of product (**4j**)

**2-Cyclohexyl-2,3-dihydro-1H-naphtho[1,2-e][1,3]oxazine(4k) (Table 2, entry 11):**

Off-white solid, m.p. 248 °C (d); FT-IR (ATR)  $\bar{\nu}$  ( $\text{cm}^{-1}$ ): 2926, 2852, 1597, 1467, 1227, 1058;  $^1\text{H}$  NMR (DMSO- $d_6$ , 500 MHz)  $\delta$  ppm: 7.66-7.81 (m, 3H, Ar-H), 7.48 (m, 1H, Ar-H), 7.35 (m, 1H, Ar-H), 6.98 (m, 1H, Ar-H), 4.99 (s, 2H, O- $\text{CH}_2$ -N), 4.33 (s, 2H, -Ar- $\text{CH}_2$ -N), 2.70 (m, 1H, CH-N), 1.08-1.86 (m, 10H, 5 $\text{CH}_2$ ).

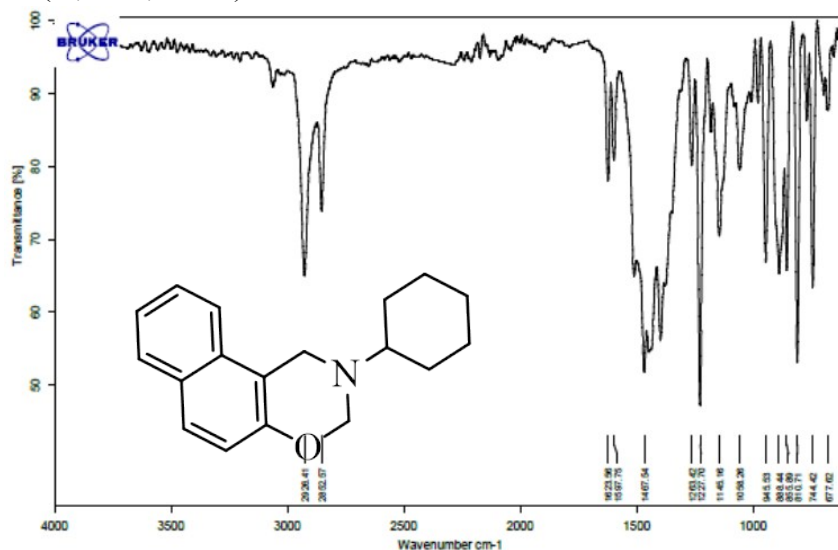

The FT-IR spectrum of product (**4k**)

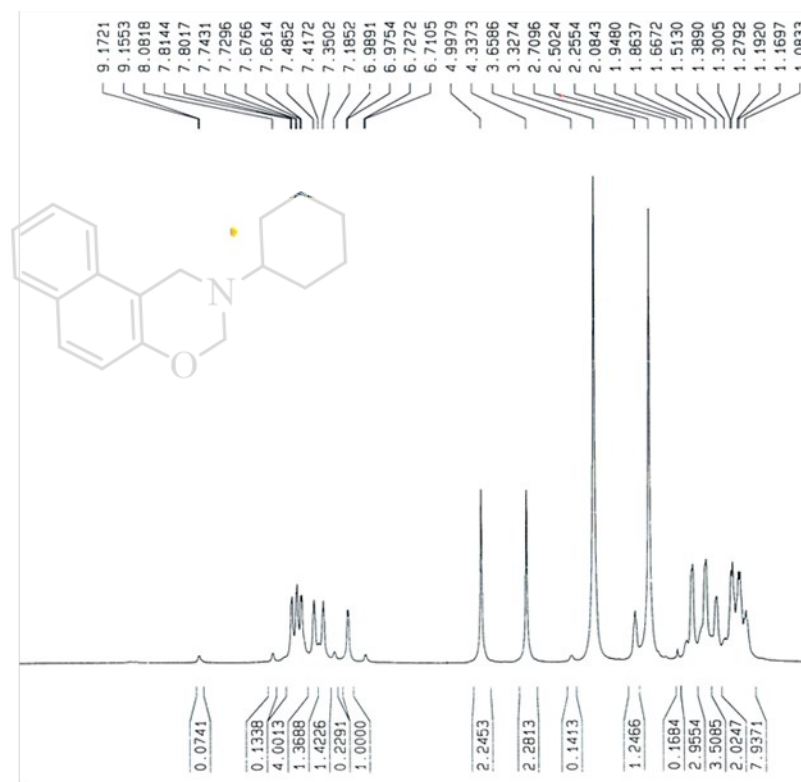

The  $^1\text{H}$  NMR (500 MHz) spectrum of product (**4k**)

**2-Butyl-2,3-dihydro-1H-naphtho[1,2-e][1,3]oxazine(4l) (Table 2, entry 12):**

White solid, m.p. 170 °C (d); FT-IR (ATR)  $\bar{\nu}$  ( $\text{cm}^{-1}$ ): 2954, 2864, 1597, 1433, 1225, 1056.

$^1\text{H}$  NMR (DMSO- $d_6$ , 500 MHz)  $\delta$  ppm: 7.81 (m, 1H, Ar-H), 7.69 (m, 2H, Ar-H), 7.47 (m, 1H, Ar-H), 7.35 (m, 1H, Ar-H), 7.00 (m, 1H, Ar-H), 4.88 (s, 2H, O- $\text{CH}_2$ -N), 4.25 (s, 2H, -Ar- $\text{CH}_2$ -N), 2.69 (m, 2H, - $\text{CH}_2$ -N), 1.53 (m, 2H,  $\text{CH}_2$ ), 1.31 (m, 2H,  $\text{CH}_2$ ), 0.87 (m, 3H,  $\text{CH}_3$ ).

$^{13}\text{C}$  NMR (DMSO- $d_6$ , 100 MHz)  $\delta$  ppm: 13.80, 19.80, 29.64, 46.94, 50.84, 81.81, 112.08, 118.25, 121.31, 123.26, 126.45, 127.57, 128.32, 128.37, 131.54, 151.51.



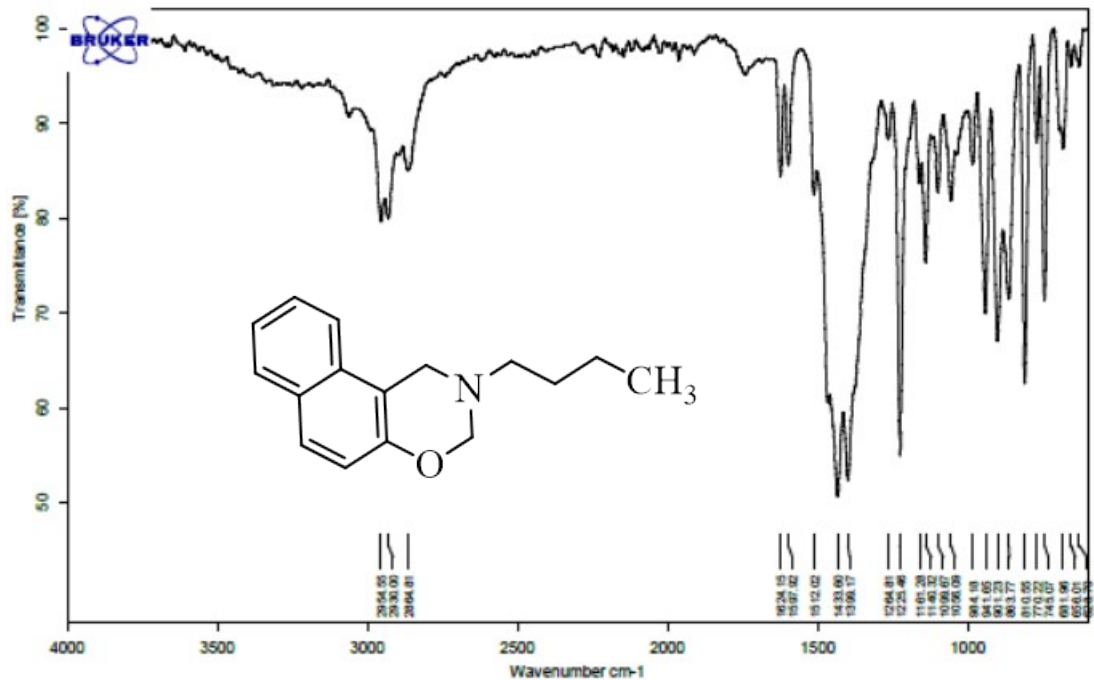

The FT-IR spectrum of product (4I)

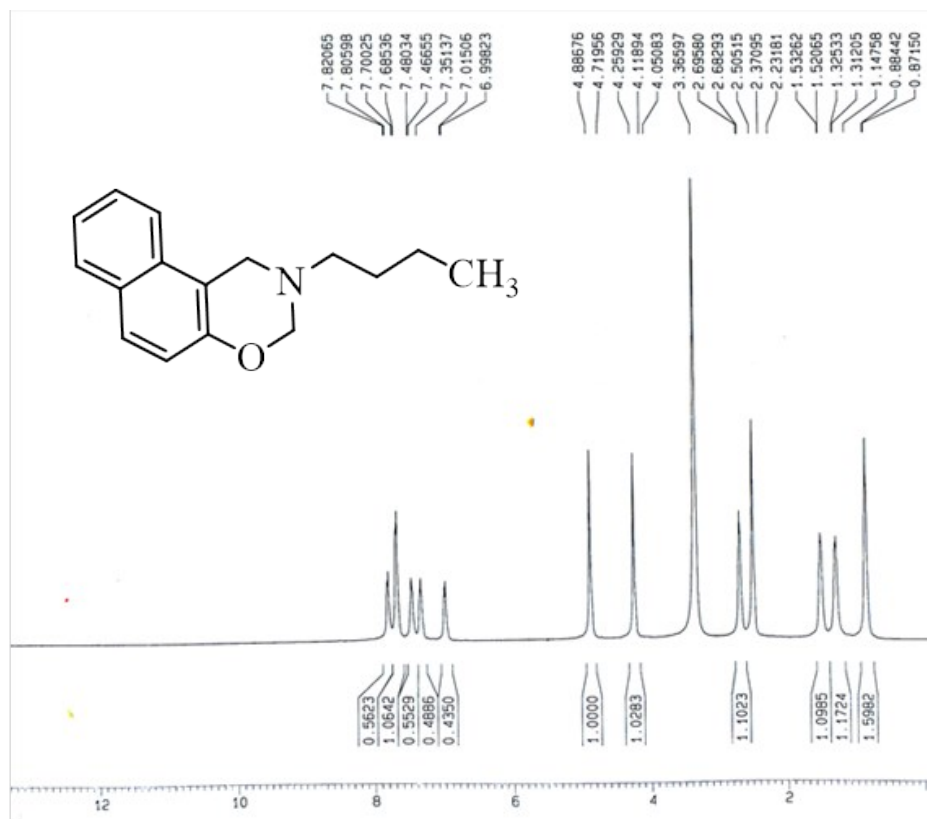

The <sup>1</sup>H NMR (500 MHz) spectrum of product (4I)

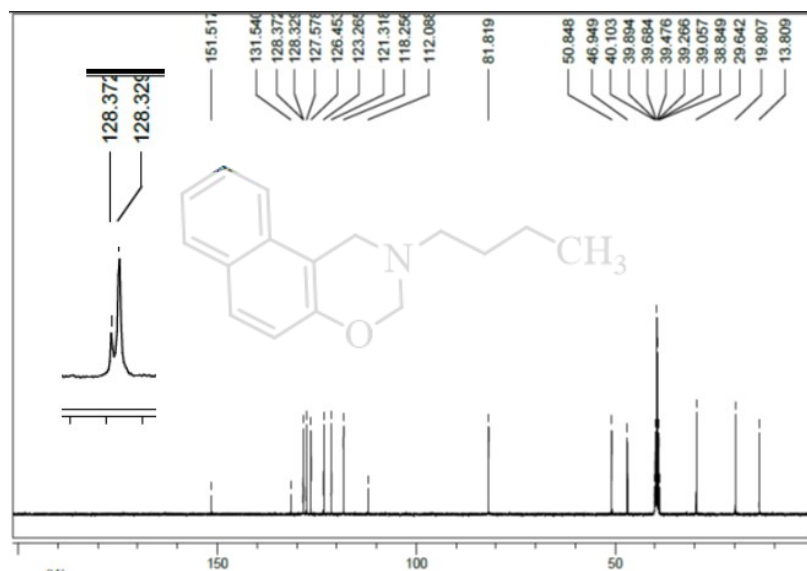

The <sup>13</sup>C-NMR (100 MHz) spectrum of product (4l)

**2-Hexyl-2,3-dihydro-1H-naphtho[1,2-e][1,3]oxazine(4m) (Table 2, entry 13):**

Brown solid, m.p. 177 °C (d); FT-IR (ATR)  $\bar{\nu}$  (cm<sup>-1</sup>): 2927, 2854, 1597, 1467, 1225, 1057;

<sup>1</sup>H NMR (DMSO-d<sub>6</sub>, 500 MHz) / $\delta$  ppm: 7.80 (m, 1H, Ar-H), 7.68 (m, 2H, Ar-H), 7.47 (m, 1H, Ar-H), 7.34 (m, 1H, Ar-H), 7.00 (m, 1H, Ar-H), 4.87 (s, 2H, O-CH<sub>2</sub>-N), 4.25 (s, 2H, -Ar-CH<sub>2</sub>-N), 2.68 (m, 2H, -CH<sub>2</sub>-N), 1.53 (m, 2H, CH<sub>2</sub>), 1.25 (m, 6H, 3CH<sub>2</sub>), 0.84 (m, 3H, CH<sub>3</sub>).

<sup>13</sup>C NMR (DMSO-d<sub>6</sub>, 125 MHz) / $\delta$  ppm: 14.77, 22.98, 27.23, 28.38, 32.02, 47.87, 52.09, 82.71, 112.97, 119.14, 122.18, 124.13, 127.32, 128.46, 129.21, 129.28, 132.44, 152.42.

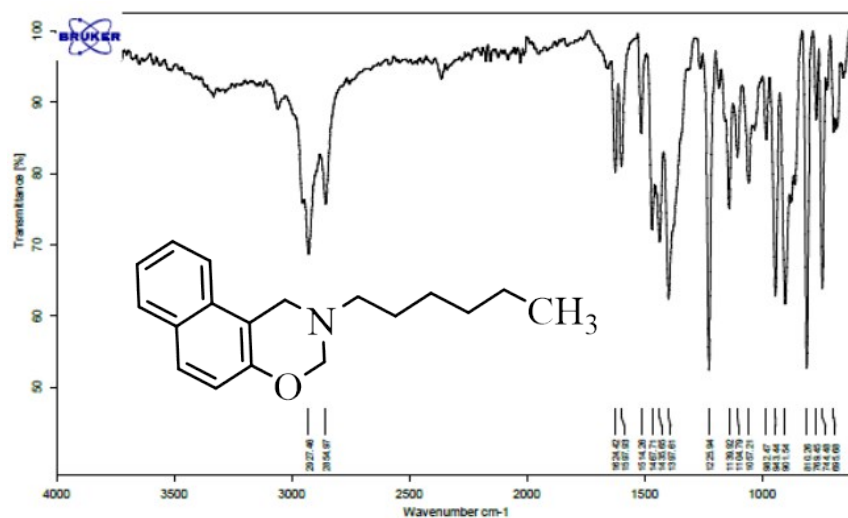

The FT-IR spectrum of product (4m)

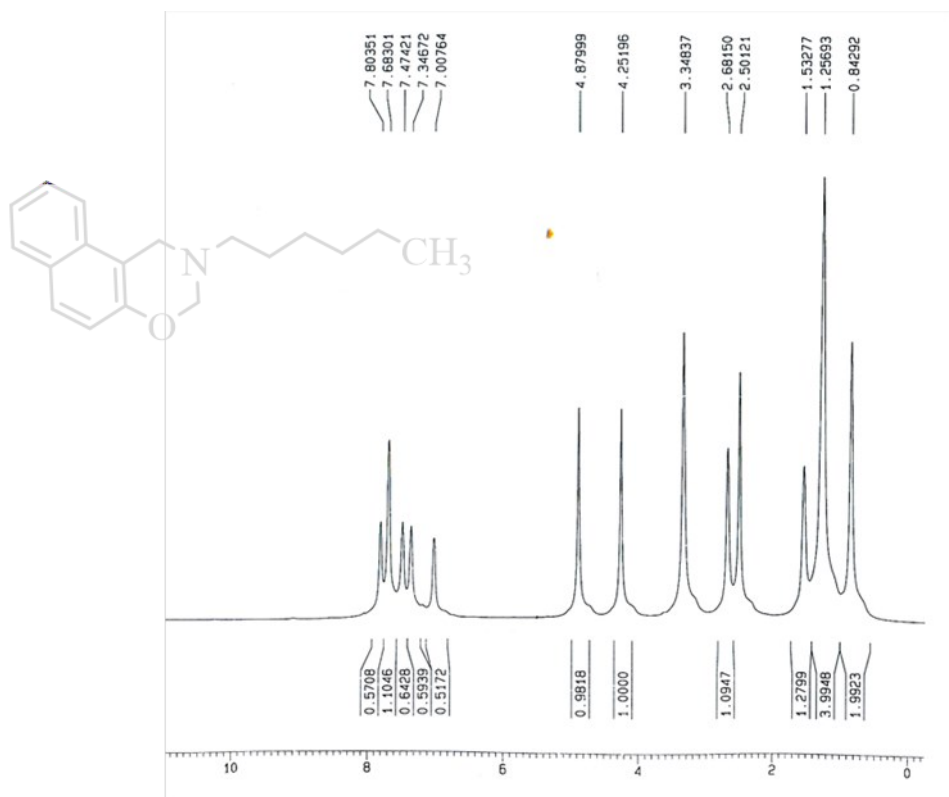

The <sup>1</sup>H NMR (500 MHz) spectrum of product (4m)

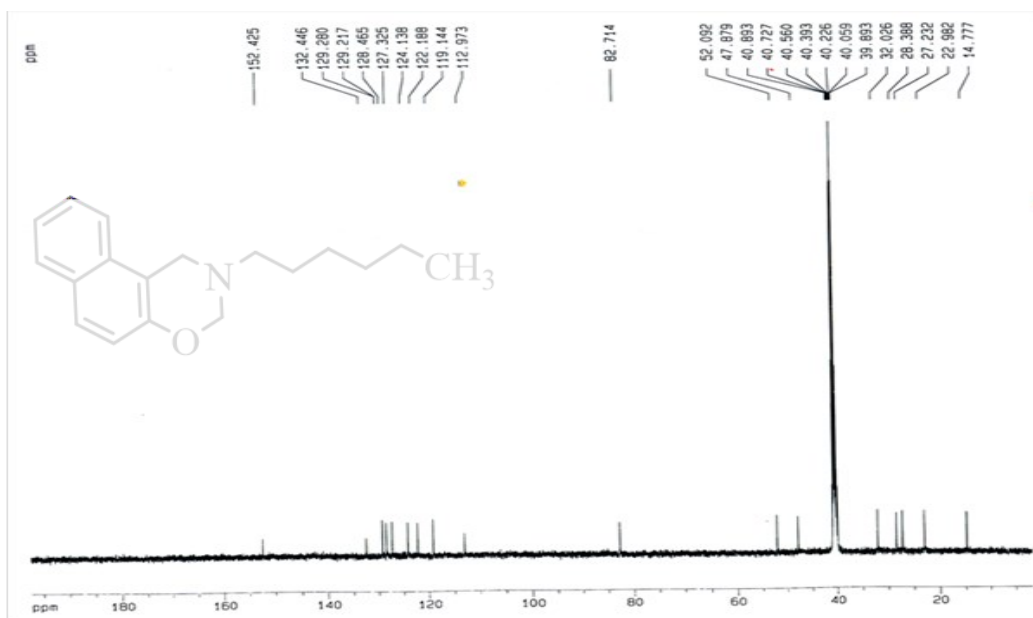

The <sup>13</sup>C-NMR (100 MHz) spectrum of product (4m)
